# Supplementary material
Source: PubMed Central journal article supplement (PMC3651738)
Supplement: NIHMS441376-supplement-3.pdf [file NIHMS441376-supplement-3.pdf]

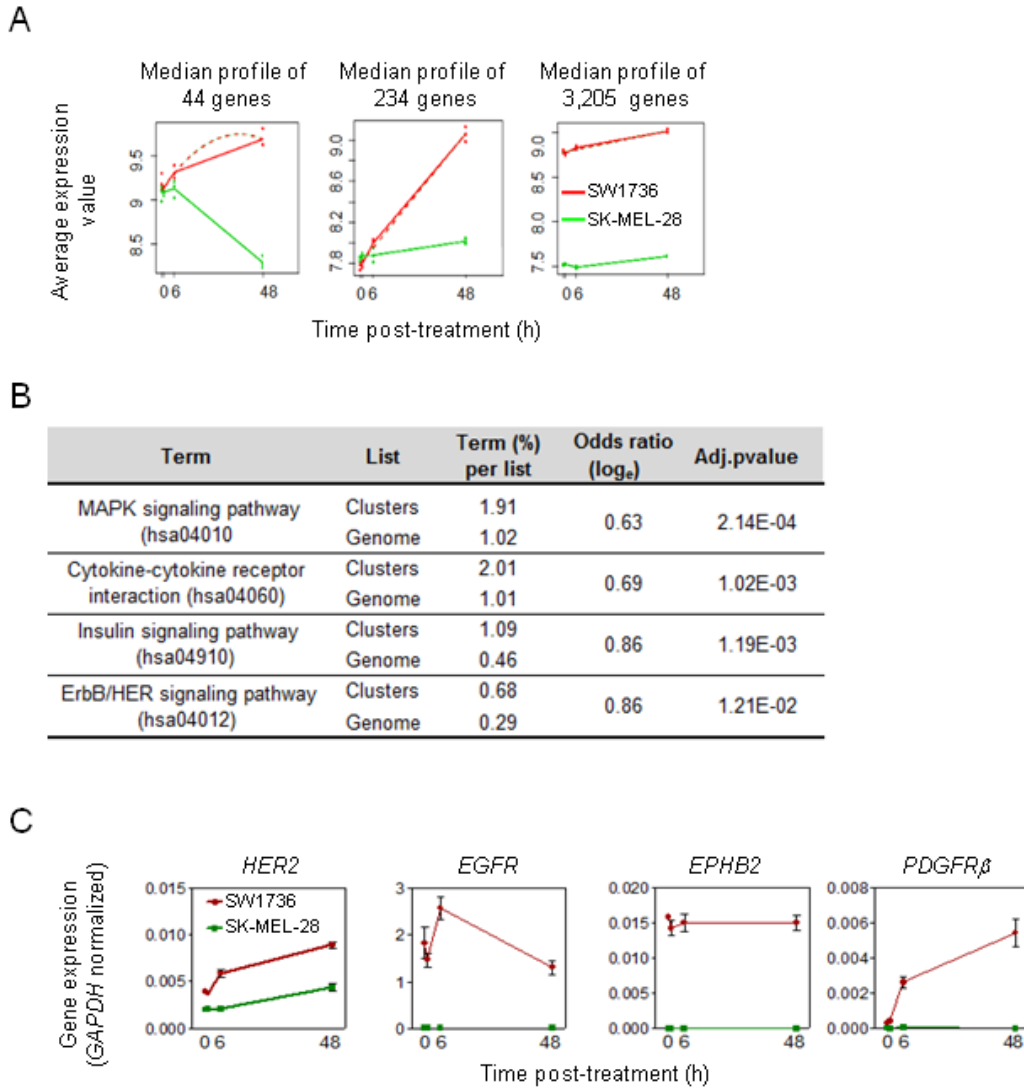

**Figure S2.** PLX4032-treated BRAF mutant thyroid cancer cells show induction or high basal expression of several RTKs compared to melanoma cell lines. **A**, gene expression profiles (Illumina HT-12 v4) of thyroid (SW1736; red) vs melanoma (SK-MEL-28; green) cells at the indicated times after treatment with 2  $\mu$ M PLX4032. Graphs represent the median profiles of gene clusters that are significantly different between the lines. **B**, table shows KEGG terms significantly over-represented in the stated gene clusters vs the rest of the genome by Fisher's exact test. The p-values are adjusted by FDR (B & H). **C**, Technical validation of differentially expressed RTKs identified by expression profiling analysis of SW1736 vs SK-

MEL-28 cells. Cells were treated with 2  $\mu$ M PLX4032 for 1, 6 or 48 h. Points represent RTK/GAPDH Q-RT-PCR values of triplicates assays (mean  $\pm$  SD).
