# Supplementary material
Source: PubMed Central journal article supplement (PMC3651738)
Supplement: NIHMS441376-supplement-4.pdf [file NIHMS441376-supplement-4.pdf]

A

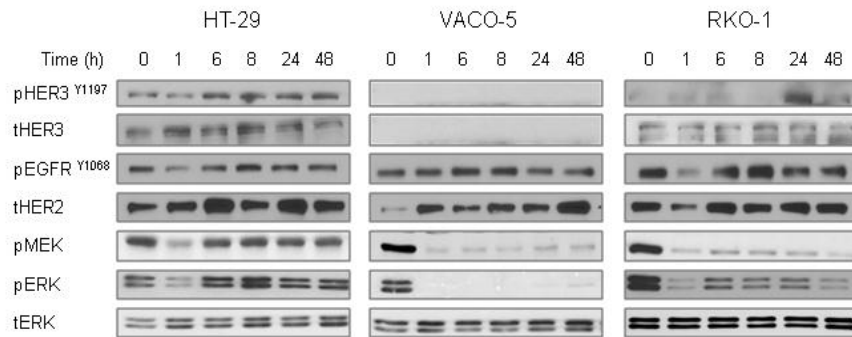

**Figure S3.** Lack of pHER3 induction by PLX4032 in *BRAF* mutant colorectal cancer cell lines. **A**, western blots of colorectal carcinoma cells treated with 2 μM PLX4032 for the indicated times. Immunoblots for pHER3 were imaged after prolonged exposure (contrast to Figure 2C). No induction of total or pHER3 was noted in any of the cell lines.
