# Supplementary material
Source: PubMed Central journal article supplement (PMC3651738)
Supplement: NIHMS441376-supplement-6.pdf [file NIHMS441376-supplement-6.pdf]

A

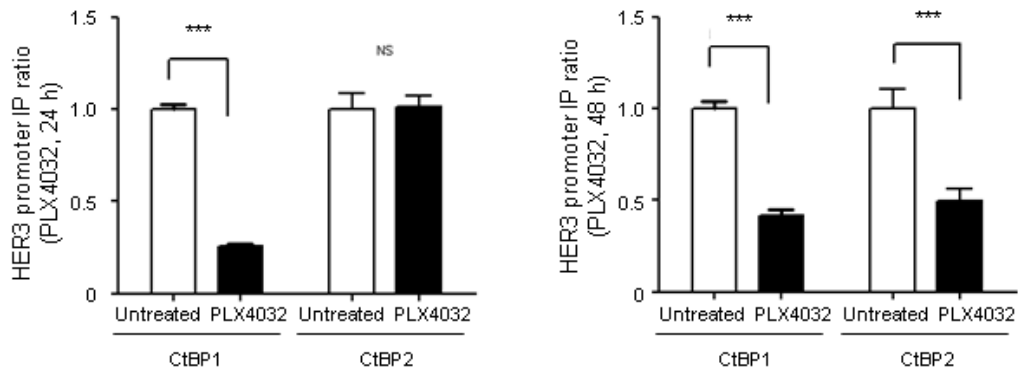

**Figure S5.** PLX4032 decreases occupancy of the *HER3* gene promoter in SW1736 thyroid cancer cells. **A**, CtBP1 or CtBP2 chromatin immunoprecipitation assays were performed in SW1736 cells treated with or without 2  $\mu$ M PLX4032 for 24 or 48 h as described in Figure 5F. Graph shows normalized Q-RT-PCR *HER3* data of the immunoprecipitated complexes compared to input lysate. Data represent mean  $\pm$  SD of two independent biological replicates performed in quintuplicate. \*\*\* $p$ <0.001
